# Supplementary material for: Pediatric practicums in undergraduate nursing programs: an integrative review
Source: publisher site journal article supplement (doi:10.1515/ijnes-2021-0091), 2022-01-01
Supplement: Supplementary file 1 [file j_ijnes-2021-0091_suppl.docx]

**Table A**

*Literature search strategy*

|  | CIHAHL | ERIC | MEDLINE (Ovid) | Google Scholar |
| --- | --- | --- | --- | --- |
| Keywords | Undergraduate, nursing program, pediatric/child health, practice placement, practicum, nursing education | Undergraduate, nursing program, pediatric/child health, practice placement, practicum, nursing education | Undergraduate, nursing program, practicum, child health, pediatric nursing | Pediatric nursing, nursing education, practicum |
| Suggested subject terms | Clinical clerkship, preceptorship, education, nursing; education, nursing; pediatric, child, health, children, infant, adolescents; nursing, practical; preceptorship; education, nursing, baccalaureate | Clinical clerkship, preceptorship, education, nursing; education, nursing; pediatric, child, health, children, infant, adolescents; nursing, practical; preceptorship; education, nursing, baccalaureate | Education, nursing baccalaureate; students, nursing; faculty, nursing; preceptorship; child, preschool, child health; child, infant; pediatric nursing | N/A |
| Searches | S1= clinical clerkship OR preceptorship OR baccalaureate OR practicum  S2 = education OR nursing OR school  S3 = (pediatric or child or children or infant or adolescent) OR health  S4 = nursing OR practical OR (pediatric or child or adolescent)  S5 = education OR nursing OR baccalaureate  S6 = nursing AND student  S7 = learning OR experience  *All within Abstract field*  S8 = S1 AND S2 AND S3 AND S4 AND S5 AND S6 AND S7 | S1= clinical clerkship OR preceptorship OR baccalaureate OR practicum  S2 = education OR nursing OR school  S3 = (pediatric or child or children or infant or adolescent) OR health  S4 = nursing OR practical OR (pediatric or child or adolescent)  S5 = education OR nursing OR baccalaureate  S6 = nursing AND student  S7 = learning OR experience  *All within Abstract field*  S8 = S1 AND S2 AND S3 AND S4 AND S5 AND S6 AND S7 | S1 = education or nursing or baccalaureate AND students or nursing  S2 = faculty or nursing (subheading: education)  S3 = pediatrics (subheading: nursing, education)  S4 = preceptorship  S5 = child or preschool or child health AND child or infant  S6 = pediatric nursing (subheading: education)  S7 = S1 AND S2 AND S3 AND S4 AND S5  S8 = S1 AND S3 AND S4  S8 = S1 AND S4  S9 = S1 AND S5 AND S6 | “Pediatric nursing” “nursing education” “practicum” |
| Results | S1 = 7,864  S2 = 565,609  S3 = 1,279,233  S4 = 721,002  S5 = 416,130  S6 = 35,168  S7 = 125,807  S8 = 884 | S1 = 9,971  S2 = 1,022,159  S3 = 369,389  S4 = 356,804  S5 = 528,755  S6 = 4, 570  S7 = 137, 039  S8 = 76 | S1 = 9,515  S2 = 155  S3 = 7,980  S4 = 1,098  S5 = 2,292,415  S6 = 0  S7 = 0  S8 = 0  S9 = 67 | 1,270 |
| Limiters | Full text, English language, academic journal (excluding report, opinion pieces and dissertations), year: 2000 – 2020. | Full text, academic journal (excluding report, opinion pieces and dissertations), year: 2000 – 2020, English language | Year: 2000 – 2020; publication type: journal article (excluding reports, opinion pieces and dissertation); language: English | Year: 2000 – 2020; publication type: review articles (excluding book chapters, opinion pieces, reports, and dissertation); language: English |
| Results after limiters | 138 | 9 | 47 | 63 |
| Articles included in review | 2 | 0 | 7 | 2 |
